# Supplementary material
Source: MDPI journal article supplement (https://www.mdpi.com/2504-186X/8/1/5)
Supplement: s1 [file s1]

# Numerical Determination of the Equivalent Sand Roughness of a Turbopump's Surface and Its Roughness Influence on the Pump Characteristics

Benjamin Torner \*, Duc Viet Duong and Frank-Hendrik Wurm

Institute of Turbomachinery, University of Rostock, Albert-Einstein Str. 2, 18059 Rostock, Germany

\* Correspondence: benjamin.torner@uni-rostock.de

## Supplementary Material: Data Base of Drag Coefficients for Regular Shapes

Within porous cells, the Discrete Porosity Method (DPM) simplifies irregular roughness shapes to regular ones. Therefore, four different shapes were chosen in this approximation: a right triangle with its right angle on left side, on right side and a triangle with its tip in the center. Moreover, a rectangle was added to the database. For the triangles, the shapes are parametrized in their slope angle, as can be seen in Figure 10 in the manuscript, whereas the rectangle is parametrized in its aspect ratio.

The following tables show the 2D drag coefficients from the RANS computations for the given shapes.

**Table S1.**  $c_D$ -values for left right-angular triangle.

| $\beta$ [°]<br>$Re$ | 15     | 30     | 45     | 60     | 75    |
|---------------------|--------|--------|--------|--------|-------|
| 1000                | 1.5065 | 1.5144 | 1.651  | 2.2806 | 2.798 |
| 5000                | 1.2659 | 1.4285 | 1.6084 | 2.2162 | 1.815 |
| 20,000              | 1.3686 | 1.4317 | 1.7072 | 2.2776 | 3.075 |
| 50,000              | 1.1119 | 1.4175 | 1.7015 | 2.0226 | 3.174 |
| 100,000             | 1.1349 | 1.3855 | 2.2911 | 2.7913 | 3.138 |
| 125,000             | 1.1206 | 1.3782 | 2.1815 | 2.4477 | 3.149 |
| 150,000             | 1.1217 | 1.3725 | 2.4417 | 2.0362 | 3.543 |
| 200,000             | 1.1143 | 1.3115 | 2.1004 | 2.1353 | 3.659 |
| > 200,000           | 1.1143 | 1.3115 | 2.1004 | 2.1353 | 3.659 |

**Table S2.**  $c_D$ -values for right right-angular triangle.

| $\beta$ [°]<br>$Re$ | 15     | 30     | 45     | 60     | 75    |
|---------------------|--------|--------|--------|--------|-------|
| 1000                | 0.6642 | 1.2588 | 1.5363 | 1.4358 | 2.74  |
| 5000                | 0.6723 | 1.1929 | 1.6748 | 1.6709 | 1.796 |
| 20,000              | 0.6793 | 1.2921 | 1.4655 | 1.6103 | 2.31  |
| 50,000              | 0.8574 | 1.4156 | 1.5723 | 2.0511 | 3.665 |
| 100,000             | 0.8505 | 1.4507 | 1.4498 | 1.5907 | 2.363 |
| 125,000             | 0.8536 | 1.2407 | 1.4542 | 1.7197 | 2.344 |
| 150,000             | 0.8589 | 1.4008 | 1.4439 | 2.0157 | 2.101 |
| 200,000             | 0.8592 | 1.389  | 1.4788 | 2.3294 | 2.214 |
| > 200,000           | 0.8592 | 1.389  | 1.4788 | 2.3294 | 2.214 |

**Table S3.**  $c_D$ -values for centered tip triangle.

| $\beta$ [°]<br>$Re$ | 15     | 30     | 45     | 60     | 75    |
|---------------------|--------|--------|--------|--------|-------|
| 1000                | 0.5938 | 0.9356 | 1.3218 | 1.4015 | 2.196 |
| 5000                | 0.6084 | 0.9696 | 1.4445 | 1.9692 | 2.321 |
| 20,000              | 0.6133 | 0.9149 | 1.0864 | 1.6169 | 1.989 |
| 50,000              | 0.8992 | 0.8709 | 1.2237 | 1.5761 | 2.117 |
| 100,000             | 0.6257 | 0.8725 | 1.2932 | 1.6421 | 1.896 |
| 125,000             | 0.9075 | 0.8727 | 1.2994 | 1.6205 | 1.85  |
| 150,000             | 0.9129 | 0.8732 | 1.2828 | 1.56   | 1.833 |
| 200,000             | 0.9135 | 0.8732 | 1.2824 | 1.5381 | 1.919 |
| > 200,000           | 0.9135 | 0.8732 | 1.2824 | 1.5381 | 1.919 |

**Table S4.**  $c_D$ -values for rectangles.

| $Re$      | Aspect ratio L/D |       |       |       |       |      |      |
|-----------|------------------|-------|-------|-------|-------|------|------|
|           | 0.25             | 0.33  | 0.5   | 1     | 2     | 3    | 4    |
| 1000      | 1.84             | 1.861 | 1.77  | 1.78  | 1.62  | 1.5  | 1.2  |
| 5000      | 2.03             | 1.87  | 1.948 | 1.88  | 1.8   | 1.64 | 1.3  |
| 20,000    | 2.06             | 1.84  | 2.08  | 1.98  | 1.78  | 1.7  | 1.18 |
| 50,000    | 2.07             | 1.85  | 2.1   | 2.09  | 1.95  | 1.79 | 1.48 |
| 100,000   | 2.08             | 1.862 | 2.42  | 2.49  | 2     | 1.84 | 1.15 |
| 125,000   | 2.08             | 1.862 | 2.58  | 2.78  | 1.89  | 1.89 | 1.18 |
| 150,000   | 2.14             | 1.89  | 1.79  | 3.014 | 1.984 | 1.93 | 1.16 |
| 200,000   | 2.18             | 1.91  | 1.8   | 3.11  | 2.02  | 1.98 | 1.18 |
| > 200,000 | 2.18             | 1.91  | 1.8   | 3.11  | 2.02  | 1.98 | 1.18 |
